# Supplementary material for: Transcriptome Responses to Different Environments in Intertidal Zones in the Peanut Worm Sipunculus nudus
Source: MDPI journal article supplement (doi:10.3390/biology12091182), 2023-08-29
Supplement: s1 [file s1]

Supplementary Materials

# Transcriptome responses to different environments in intertidal zones in the peanut worm *Sipunculus nudus*

Junwei Li <sup>1,2\*</sup>, Jiufu Wen <sup>1,2</sup>, Ruiping Hu <sup>3\*</sup>, Surui Pei <sup>4</sup>, Ting Li <sup>1,2</sup>, Binbin Shan <sup>1,2</sup>, Honghui Huang <sup>1,2</sup> and Changbo Zhu <sup>5\*</sup>

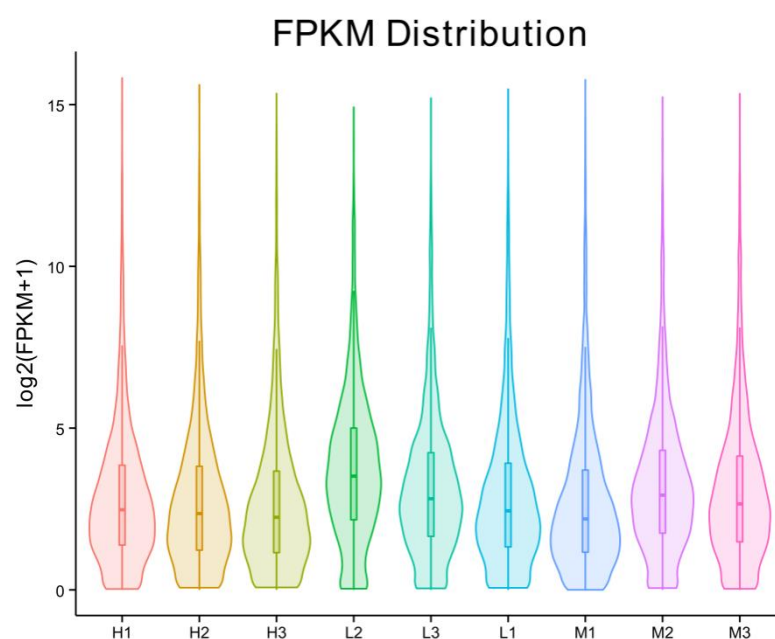

**Figure S1.** Violin diagram of the expression quantity of unigenes of *S. nudus* from groups H, M, and L (n=3). H represents the peanut worms from the high tidal flat, M represents peanut worms from the middle tidal flat, and L represents the peanut worms from the low tidal flat. FPKM (Fragments Per Kilobase of transcript sequence per Millions base pairs sequenced).

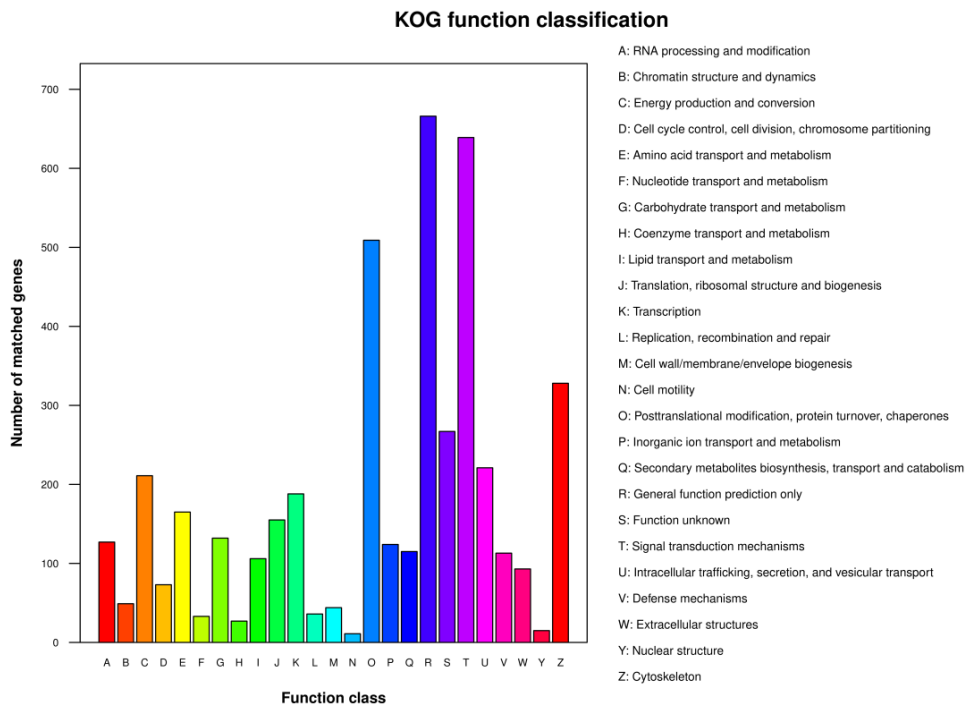

**Figure S2.** KOG function classification of transcripts. The 23063 unigenes were grouped into 25 KOG categories.

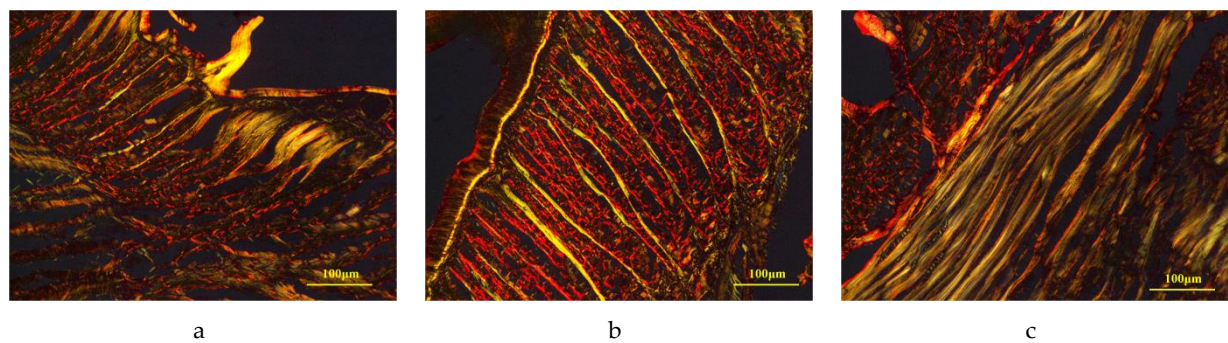

**Figure S3.** Sirius staining of the mussle of *S. nudus*. The bright red and crude fiber is collagen fiber I, the green and fine fiber is collagen fiber III. a means the sirius staining of *S. nudus* from H site, b means the sirius staining of *S. nudus* from M site, c means the sirius staining of *S. nudus* from L site.

| Table S1. Names and primer sequences of genes used for quantitative real-time PCR analysis. |   |                         |        |
|---------------------------------------------------------------------------------------------|---|-------------------------|--------|
| Gene name                                                                                   |   | Primer sequence         | length |
| alpha-tubulin                                                                               | F | GTGATTTGGCCAAGGTGCAG    | 141bp  |
|                                                                                             | R | TACCCTCTCCCACGTACCAG    |        |
| Crassostrea gigas lysine--tRNA ligase-like                                                  | F | CGCTTGAGTATGGTTTGCCG    | 163bp  |
|                                                                                             | R | GCTGCATGTTGTTTCAGCTCC   |        |
| Haliotis asinina Hsp90A mRNA                                                                | F | TGGAAGGACAGCTTGAGTTCAG  | 181bp  |
|                                                                                             | R | GAATCCACCACACCCCTTGATGA |        |
| inhibitor of nuclear factor-kappaB protein                                                  | F | TGATGCCCAGGAGGGAAAAC    | 124bp  |
|                                                                                             | R | ATCGTAAGACCGTGCGTGAA    |        |

|                                                                          |   |                       |       |
|--------------------------------------------------------------------------|---|-----------------------|-------|
| Python bivittatus protein arginine methyltransferase 1                   | F | CGTTCTCAGCACCATTTCACC | 204bp |
|                                                                          | R | TTGGCCAAATAGCTCCTCTCC |       |
| Astoria latipes glutaminyl-tRNA synthetase                               | F | CAGGTTACGTGGTACGGGTG  | 103bp |
|                                                                          | R | TTAGGTTTTGGTGCCTCGGT  |       |
| Apteryx australis mantelli threonyl-tRNA synthetase                      | F | CAGGTTACGTGGTACGGGTG  | 113bp |
|                                                                          | R | TTAGGTTTTGGTGCCTCGGT  |       |
| Octopus bimaculoides N-acetylated-alpha-linked acidic dipeptidase 2-like | F | ATGCAGGTCTCACGAGCATTT | 108bp |
|                                                                          | R | AGCGCTGTTTGTGAACTTGG  |       |

**Table S2.** The enriched KEGG pathways and DEGs in the H vs. M and L vs. H groups.

| Pathway name | ID                                           |                  | H-M    |       |          |          |        | L-H   |          |          |
|--------------|----------------------------------------------|------------------|--------|-------|----------|----------|--------|-------|----------|----------|
|              | Description                                  | Gene             | Change | Fold  | P-value  | FDR      | Change | Fold  | P-value  | FDR      |
| MAPK         | Sipunculus_f7p60_2477_transcript9<br>537_g1  | HSPA1            | down   | -1.81 | 4.08E-07 | 4.00E-05 | up     | 3.41  | 4.61E-08 | 4.80E-06 |
|              | Sipunculus_f2p56_1933_transcript1<br>5246_g1 | GADD45           | down   | -1.91 | 0.000737 | 0.013193 |        |       |          |          |
|              | Sipunculus_f5p60_3036_transcript5<br>531_g1  | MEK1             | down   | -1.39 | 1.82E-07 | 2.03E-05 |        |       |          |          |
|              | Sipunculus_f2p30_2444_transcript9<br>857_g1  | HSPB1            | up     | 3.05  | 4.06E-07 | 4.00E-05 | down   | -2.44 | 1.89E-05 | 0.00072  |
|              | Sipunculus_f2p39_1965_transcript1<br>4895_g1 | MKP              | up     | 1.61  | 4.29E-05 | 1.44E-03 | down   | -1.57 | 0.000138 | 0.00333  |
|              | Sipunculus_f2p39_2685_transcript7<br>898_g1  | MRAS             | up     | 1.91  | 9.86E-11 | 3.23E-08 | down   | -2.24 | 0.000102 | 0.002607 |
|              | Sipunculus_f2p60_2253_transcript1<br>1804_g3 | MKP              | up     | 1.51  | 2.27E-03 | 2.95E-02 | down   | -1.62 | 0.002024 | 0.025167 |
| Influenza A  | Sipunculus_f2p28_3135_transcript5<br>416_g1  | NFKBIA           | down   | -1.69 | 0.000979 | 0.016154 | up     | 1.42  | 0.001698 | 0.022183 |
|              | Sipunculus_f2p34_1933_transcript1<br>5070_g1 | UAP56            | down   | -1.35 | 3.28E-05 | 0.001172 | up     | 1.53  | 0.00035  | 0.006924 |
|              | Sipunculus_f4p60_1582_transcript1<br>8224_g1 | PRSS;<br>trypsin | down   | -1.79 | 1.50E-05 | 0.000658 | up     | 1.73  | 0.000768 | 0.012306 |
|              | Sipunculus_f5p60_3036_transcript5<br>531_g1  | MEK1             | down   | -1.39 | 1.82E-07 | 2.03E-05 |        |       |          |          |
|              | Sipunculus_f6p60_3095_transcript5<br>232_g1  | EIF2S1           | down   | -1.58 | 0.000958 | 0.015940 |        |       |          |          |
|              | Sipunculus_f7p60_2477_transcript9<br>537_g1  | HSPA1            | down   | -1.81 | 4.08E-07 | 4.00E-05 | up     | 3.41  | 4.61E-08 | 4.80E-06 |
|              | Sipunculus_f8p60_3918_transcript2<br>145_g1  | FURIN,<br>PCSK3  | down   | -2.01 | 0.000250 | 0.005946 |        |       |          |          |

|                                     |                                          |                |      |       |            |            |      |       |          |          |
|-------------------------------------|------------------------------------------|----------------|------|-------|------------|------------|------|-------|----------|----------|
| Legionellosis                       | Sipunculus_f11p60_2784_transcript6547_g1 | groEL, HSPD1   | down | -1.55 | 0.00019876 | 0.00509005 | up   | 1.53  | 8.34E-05 | 0.002263 |
|                                     | Sipunculus_f2p28_3135_transcript5416_g1  | NFKBIA         | down | -1.69 | 0.00097914 | 0.0161544  | up   | 1.42  | 0.001698 | 0.022183 |
|                                     | Sipunculus_f6p60_1939_transcript15139_g2 | EEF1A          | down | -4.48 | 2.33E-06   | 0.00016503 | up   | 4.17  | 3.52E-05 | 0.001185 |
|                                     | Sipunculus_f7p60_2477_transcript9537_g1  | HSPA1          | down | -1.81 | 4.08E-07   | 4.00E-05   | up   | 3.41  | 4.61E-08 | 4.80E-06 |
| Antigen processing and presentation | Sipunculus_f7p60_2477_transcript9537_g1  | HSPA1          | down | -1.81 | 4.08E-07   | 4.00E-05   | up   | 3.41  | 4.61E-08 | 4.80E-06 |
|                                     | Sipunculus_f2p32_4655_transcript1020_g1  | CANX; calnexin | down | -1.19 | 0.0005886  | 0.01132951 | up   | 1.28  | 0.001635 | 0.021715 |
|                                     | Sipunculus_f2p45_3116_transcript5211_g1  | htpG, HSP90A   | down | -2.18 | 1.11E-05   | 0.00054434 |      |       |          |          |
|                                     | Sipunculus_f6p60_2671_transcript8055_g1  | HS90A_RABIT    |      |       |            |            | up   | 2.07  | 1.03E-07 | 8.69E-06 |
| Measles                             | Sipunculus_f7p60_2477_transcript9537_g1  | HSPA1          | down | -1.81 | 4.08E-07   | 4.00E-05   | up   | 3.41  | 4.61E-08 | 4.80E-06 |
|                                     | Sipunculus_f2p28_3135_transcript5416_g1  | NFKBIA         | down | -1.69 | 0.00097914 | 0.0161544  | up   | 1.42  | 0.001698 | 0.022183 |
|                                     | Sipunculus_f6p60_3095_transcript5232_g1  | EIF2S1         | down | -1.58 | 0.00095804 | 0.01594029 |      |       |          |          |
| FoxO signaling pathway              | Sipunculus_f22p60_2506_transcript8785_g1 | PRMT1          | down | -2.30 | 1.06E-09   | 2.60E-07   | up   | 2.18  | 7.66E-14 | 4.97E-11 |
|                                     | Sipunculus_f2p56_1933_transcript15246_g1 | GADD45         | down | -1.91 | 0.00073695 | 0.01319348 |      |       |          |          |
|                                     | Sipunculus_f3p52_2644_transcript8165_g1  | KLF2           | down | -2.29 | 1.98E-06   | 0.00014373 | up   | 2.56  | 1.80E-06 | 0.000102 |
|                                     | Sipunculus_f5p60_3036_transcript5531_g1  | MEK1           | down | -1.40 | 1.82E-07   | 2.03E-05   |      |       |          |          |
|                                     | Sipunculus_f2p13_7308_transcript62_g1    | PRKAA          | up   | 1.36  | 4.40E-06   | 0.00026051 | down | -1.51 | 1.96E-05 | 0.000744 |
|                                     | Sipunculus_f2p31_5343_transcript550_g1   | FBXO25_32      | up   | 2.08  | 0.00234829 | 0.03026568 | down | -2.42 | 0.000223 | 0.004884 |
|                                     | Sipunculus_f2p21_4943_transcript755_g1   | PRKAB          | up   | 1.78  | 2.46E-13   | 1.81E-10   |      |       |          |          |
| Toxoplasmosis                       | Sipunculus_f7p60_2477_transcript9537_g1  | HSPA1          | down | -1.81 | 4.08E-07   | 4.00E-05   | up   | 3.41  | 4.61E-08 | 4.80E-06 |
|                                     | Sipunculus_f2p28_3135_transcript5416_g1  | NFKBIA         | down | -1.69 | 0.00097914 | 0.0161544  | up   | 1.42  | 0.001698 | 0.022183 |

|                                                             |                                              |                     |      |       |                |                |      |       |           |              |
|-------------------------------------------------------------|----------------------------------------------|---------------------|------|-------|----------------|----------------|------|-------|-----------|--------------|
|                                                             | Sipunculus_f2p11_5185_transcript6<br>53_g1   | BIRC2_<br>HUMA<br>N |      |       |                |                | up   | 1.73  | 0.000707  | 0.01161<br>1 |
|                                                             | Sipunculus_f7p60_2477_transcript9<br>537_g1  | HSPA1               | down | -1.81 | 4.08E-07       | 4.00E-05       | up   | 3.41  | 4.61E-08  | 4.80E-<br>06 |
|                                                             | Sipunculus_f2p45_3116_transcript5<br>211_g1  | htpG,<br>HSP90A     | down | -2.18 | 1.11E-05       | 0.000544<br>34 |      |       |           |              |
| Estrogen<br>signaling<br>pathway                            | Sipunculus_f2p54_2779_transcript7<br>188_g1  | FKBP4_5             | down | -1.17 | 9.73E-05       | 0.002838<br>1  | up   | 1.30  | 0.000286  | 0.00594<br>7 |
|                                                             | Sipunculus_f5p60_3036_transcript5<br>531_g1  | MEK1                | down | -1.40 | 1.82E-07       | 2.03E-05       |      |       |           |              |
|                                                             | Sipunculus_f5p56_2163_transcript1<br>2903_g  | CALL4_<br>BOVIN     |      |       |                |                | up   | 1.31  | 0.0009    | 0.01382      |
|                                                             | Sipunculus_f6p60_2671_transcript8<br>055_g1  | HS90A_<br>RABIT     |      |       |                |                | up   | 2.07  | 1.03E-07  | 8.69E-<br>06 |
|                                                             | Sipunculus_f7p60_2477_transcript9<br>537_g1  | HSPA1               | down | -1.81 | 4.08E-07       | 4.00E-05       | up   | 3.41  | 4.61E-08  | 4.80E-<br>06 |
|                                                             | Sipunculus_f6p60_3741_transcript2<br>638_g1  | CRYAB_<br>CHICK     | down | -3.43 | 0.000121<br>01 | 0.003394<br>09 |      |       |           |              |
|                                                             | Sipunculus_f8p60_1918_transcript1<br>5288_g1 | SODC_P<br>BCV1      |      |       |                |                | up   | 1.57  | 0.001347  | 0.01848<br>5 |
| Longevity<br>regulating<br>pathway -<br>multiple<br>species | Sipunculus_f2p13_7308_transcript6<br>2_g1    | PRKAA               | up   | 1.36  | 4.40E-06       | 0.000260<br>51 | down | -1.51 | 1.96E-05  | 0.00074<br>4 |
|                                                             | Sipunculus_f2p21_4943_transcript7<br>55_g1   | PRKAB               | up   | 1.78  | 2.46E-13       | 1.81E-10       |      |       |           |              |
|                                                             | Sipunculus_f28p60_2933_transcript<br>6091_g1 | AKTS1_<br>HUMA<br>N |      |       |                |                | down | -2.05 | 0.002166  | 0.02632      |
|                                                             | Sipunculus_f7p54_7655_transcript4<br>6_g1    | ADCY9_<br>MOUSE     |      |       |                |                | down | -1.95 | 8.44E-05  | 0.00226<br>8 |
|                                                             | Sipunculus_f8p60_3054_transcript5<br>592_g1  | AKTS1_<br>HUMA<br>N |      |       |                |                | down | -2.94 | 2.57E-19  | 2.99E-<br>16 |
|                                                             | Sipunculus_f11p60_3036_transcript<br>5533_g1 | QARS                | down | -1.34 | 0.000439       | 0.009097       | up   | 1.33  | 0.0000632 | 0.0109       |
| Aminocayl-<br>tRNA<br>biosynthesis                          | Sipunculus_f2p13_3265_transcript4<br>250_g1  | SARS                | down | -1.37 | 0.001323       | 0.019876       | up   | 1.17  | 0.001957  | 0.02462      |
|                                                             | Sipunculus_f2p36_3901_transcript2<br>213_g1  | RARS                | down | -1.77 | 5.29E-09       | 9.44E-07       | up   | 1.17  | 0.003023  | 0.03377      |
|                                                             | Sipunculus_f4p60_2568_transcript8<br>875_g1  | KARS                | down | -2.71 | 2.48E-05       | 0.000974       | up   | 2.39  | 9.11E-06  | 0.00041<br>1 |

|                                             |      |      |         |          |          |    |      |          |              |
|---------------------------------------------|------|------|---------|----------|----------|----|------|----------|--------------|
| Sipunculus_f5p60_3215_transcript4<br>632_g1 | TARS | down | -1.52   | 1.01E-05 | 0.000511 | up | 1.37 | 5.68E-05 | 0.00173<br>4 |
| Sipunculus_f6p60_3110_transcript5<br>288_g1 | DARS | down | -1.3778 | 0.000549 | 0.01088  |    |      |          |              |

**Table S3.** The annotated genes in the top 10 pathways from KEGG enrichment analysis.

| Gene name                                                             | KEGG pathways                                                                                                                                                                                                                                                           |
|-----------------------------------------------------------------------|-------------------------------------------------------------------------------------------------------------------------------------------------------------------------------------------------------------------------------------------------------------------------|
| HSPA1_8; heat shock 70kDa protein 1/8                                 | Influenza A, Legionellosis, Antigen processing and presentation, Measles, MAPK signaling pathway, Toxoplasmosis, Longevity regulating pathway - multiple species, Estrogen signaling pathway, Protein processing in endoplasmic reticulum, Epstein-Barr virus infection |
| MAP2K1, MEK1; mitogen-activated protein kinase kinase 1 [EC:2.7.12.2] | Influenza A, MAPK signaling pathway, Melanoma, FoxO signaling pathway, Estrogen signaling pathway, Bladder cancer, Apoptosis, VEGF signaling pathway                                                                                                                    |
| NFKBIA; NF-kappa-B inhibitor alpha                                    | Influenza A, Legionellosis, Measles, Toxoplasmosis, NOD-like receptor signaling pathway, Apoptosis, Leishmaniasis, Epstein-Barr virus infection                                                                                                                         |
| MAP3K7IP1, TAB1; TAK1-binding protein 1                               | MAPK signaling pathway, Toxoplasmosis, NOD-like receptor signaling pathway, Leishmaniasis, Epstein-Barr virus infection                                                                                                                                                 |
| CRYAB; crystallin, alpha B                                            | Protein processing in endoplasmic reticulum                                                                                                                                                                                                                             |
| HSPB1; heat shock protein beta-1                                      | MAPK signaling pathway, VEGF signaling pathway                                                                                                                                                                                                                          |
| CYP2J; cytochrome P450, family 2, subfamily J [EC:1.14.14.1]          | Linoleic acid metabolism, Longevity regulating pathway - worm                                                                                                                                                                                                           |
| htpG, HSP90A; molecular chaperone HtpG                                | Antigen processing and presentation, Estrogen signaling pathway, Protein processing in endoplasmic reticulum                                                                                                                                                            |
| GADD45; growth arrest and DNA-damage-inducible protein                | MAPK signaling pathway, Melanoma, Apoptosis, FoxO signaling pathway,                                                                                                                                                                                                    |
| CANX; calnexin                                                        | Antigen processing and presentation, Protein processing in endoplasmic reticulum                                                                                                                                                                                        |
| PRKAB; 5-AMP-activated protein kinase, regulatory beta subunit        | FoxO signaling pathway, Longevity regulating pathway - multiple species, Circadian rhythm                                                                                                                                                                               |
| PRKAG; 5-AMP-activated protein kinase, regulatory gamma subunit       | FoxO signaling pathway, Longevity regulating pathway - multiple species, Circadian rhythm                                                                                                                                                                               |

Of the DEGs, 12 genes (*HSPA1\_8*, *MAP2K1* (*MEK1*), *NFKBIA*, *MAP3K7IP1* (*TAB1*), *CRYAB*, *HSPB1*, *CYP2J*, *GADD45*, *HSP90A* (*htpG*), *CANX*, *PRKAB* and *PRKAG*) appeared most frequently in the comparison groups (H vs. M, M vs. L and L vs. H), and they are displayed in Tab. S3.

**Table S4.** The DEGs and function annotation present in clusters 1, 2 and 7.

| Gene ID                                                  | Function annotation                                                                                                   |
|----------------------------------------------------------|-----------------------------------------------------------------------------------------------------------------------|
| Sipunculus_f3p35_1914_transcript16239_g1                 | PREDICTED: KH domain-containing, RNA-binding, signal transduction-associated protein 2-like [Leptonychotes weddellii] |
| <b>Cluster 1</b> Sipunculus_f2p50_3343_transcript3972_g1 | hypothetical protein CAPTEDRAFT_202917 [Capitella teleta]                                                             |
| Sipunculus_f4p60_1986_transcript14428_g1                 | PREDICTED: enolase-phosphatase E1 [Latimeria chalumnae]                                                               |
| Sipunculus_f2p37_4603_transcript1099_g1                  | hypothetical protein CAPTEDRAFT_163980 [Capitella teleta]                                                             |

---

|                                          |                                                                                               |
|------------------------------------------|-----------------------------------------------------------------------------------------------|
| Sipunculus_f6p60_1297_transcript19499_g1 | putative FK506-binding protein [Suberites domuncula]                                          |
| Sipunculus_f3p55_2521_transcript9141_g1  | hypothetical protein BRAFLDRAFT_284855 [Branchiostoma floridae]                               |
| Sipunculus_f3p27_5380_transcript533_g1   | PREDICTED: follistatin-A-like isoform X1 [Lingula anatina]                                    |
| Sipunculus_f2p59_1507_transcript18724_g1 | PREDICTED: activator of 90 kDa heat shock protein ATPase homolog 1-like [Lingula anatina]     |
| Sipunculus_f3p56_2884_transcript6501_g1  | hypothetical protein CAPTEDRAFT_156414 [Capitella teleta]                                     |
| Sipunculus_f10p60_890_transcript20406_g1 | hypothetical protein AC249_AIPGENE6048 [Exaiptasia pallida]                                   |
| Sipunculus_f4p60_1730_transcript17227_g2 | PREDICTED: RNA-binding protein with serine-rich domain 1-like [Lingula anatina]               |
| Sipunculus_f6p60_2412_transcript10067_g1 | hypothetical protein CAPTEDRAFT_161470 [Capitella teleta]                                     |
| Sipunculus_f4p60_1545_transcript18354_g1 | RecName: Full=Cytochrome c                                                                    |
| Sipunculus_f4p60_1082_transcript20150_g1 | PREDICTED: 10 kDa heat shock protein, mitochondrial isoform X2 [Latimeria chalumnae]          |
| Sipunculus_f2p60_2710_transcript7692_g1  | PREDICTED: 3-oxoacyl-[acyl-carrier-protein] reductase FabG-like isoform X1 [Lingula anatina]  |
| Sipunculus_f3p57_1966_transcript14662_g1 | PREDICTED: inositol-3-phosphate synthase 1-A-like [Lingula anatina]                           |
| Sipunculus_f2p60_2052_transcript13877_g2 | chaperonin containing tcp1 [Haliotis discus discus]                                           |
| Sipunculus_f4p60_2240_transcript11973_g2 | PREDICTED: pancreatic lipase-related protein 2-like [Nasonia vitripennis]                     |
| Sipunculus_f2p24_2175_transcript11323_g1 | hypothetical protein CAPTEDRAFT_223809 [Capitella teleta]                                     |
| Sipunculus_f3p35_4276_transcript1514_g1  | hypothetical protein CAPTEDRAFT_160144 [Capitella teleta]                                     |
| Sipunculus_f4p54_1868_transcript15532_g1 | hypothetical protein LOTGIDRAFT_157797 [Lottia gigantea]                                      |
| Sipunculus_f8p60_5106_transcript700_g1   | PREDICTED: microphthalmia-associated transcription factor-like isoform X3 [Crassostrea gigas] |
| Sipunculus_f3p60_767_transcript20585_g2  | hypothetical protein CGI_10000492 [Crassostrea gigas]                                         |
| Sipunculus_f10p60_3062_transcript5497_g1 | hypothetical protein CAPTEDRAFT_224386 [Capitella teleta]                                     |
| Sipunculus_f2p13_3265_transcript4250_g1  | PREDICTED: serine--tRNA ligase, cytoplasmic-like [Aplysia californica]                        |
| Sipunculus_f3p48_2128_transcript13054_g1 | PREDICTED: multifunctional protein ADE2-like [Crassostrea gigas]                              |
| Sipunculus_f2p34_3496_transcript3382_g1  | hypothetical protein LOTGIDRAFT_130231, partial [Lottia gigantea]                             |
| Sipunculus_f6p60_4276_transcript1495_g1  | hypothetical protein CAPTEDRAFT_134807, partial [Capitella teleta]                            |
| Sipunculus_f5p45_3000_transcript5676_g1  | PREDICTED: ATP-binding cassette sub-family E member 1-like [Aplysia californica]              |
| Sipunculus_f2p53_2306_transcript11202_g1 | PREDICTED: aladin-like [Lingula anatina]                                                      |
| Sipunculus_f22p60_2506_transcript8785_g1 | PREDICTED: protein arginine N-methyltransferase 1-like [Octopus bimaculoides]                 |
| Sipunculus_f2p52_2601_transcript8604_g2  | PREDICTED: uncharacterized protein LOC106157175 [Lingula anatina]                             |
| Sipunculus_f2p45_2456_transcript9715_g1  | PREDICTED: T-complex protein 1 subunit zeta-like [Lingula anatina]                            |
| Sipunculus_f3p52_2644_transcript8165_g1  | kruppel-like factor 1/2/4 [Leptochiton asellus]                                               |
| Sipunculus_f2p20_3244_transcript4482_g1  | PREDICTED: uncharacterized protein LOC105343207 isoform X4 [Crassostrea gigas]                |
| Sipunculus_f2p29_2983_transcript5977_g1  | PREDICTED: chymotrypsinogen A-like [Lingula anatina]                                          |
| Sipunculus_f2p54_2779_transcript7188_g1  | hypothetical protein LOTGIDRAFT_102242 [Lottia gigantea]                                      |

---

---

|                                           |                                                                                                                                    |
|-------------------------------------------|------------------------------------------------------------------------------------------------------------------------------------|
| Sipunculus_f21p60_2267_transcript11731_g1 | PREDICTED: dolichyl-diphosphooligosaccharide--protein glycosyltransferase subunit 2-like isoform X3 [ <i>Aplysia californica</i> ] |
| Sipunculus_f2p42_3913_transcript2193_g1   | hypothetical protein CAPTEDRAFT_229004 [ <i>Capitella teleta</i> ]                                                                 |
| Sipunculus_f3p60_3685_transcript2783_g2   | hypothetical protein CAPTEDRAFT_181870 [ <i>Capitella teleta</i> ]                                                                 |
| Sipunculus_f2p15_3326_transcript4212_g1   | hypothetical protein LOTGIDRAFT_204438 [ <i>Lottia gigantea</i> ]                                                                  |
| Sipunculus_f5p60_3215_transcript4632_g1   | hypothetical protein CAPTEDRAFT_158346 [ <i>Capitella teleta</i> ]                                                                 |
| Sipunculus_f4p46_3102_transcript5057_g1   | PREDICTED: cytosolic non-specific dipeptidase-like [ <i>Maylandia zebra</i> ]                                                      |
| Sipunculus_f9p60_2011_transcript13559_g1  | PREDICTED: uncharacterized protein LOC106153767 [ <i>Lingula anatina</i> ]                                                         |
| Sipunculus_f2p45_3174_transcript4743_g1   | PREDICTED: heterogeneous nuclear ribonucleoprotein R-like isoform X7 [ <i>Harpegnathos saltator</i> ]                              |
| Sipunculus_f2p34_1933_transcript15070_g1  | PREDICTED: spliceosome RNA helicase DDX39B [ <i>Crassostrea gigas</i> ]                                                            |
| Sipunculus_f2p34_3140_transcript4953_g1   | hypothetical protein CAPTEDRAFT_221834 [ <i>Capitella teleta</i> ]                                                                 |
| Sipunculus_f2p60_1878_transcript15638_g1  | hypothetical protein CAPTEDRAFT_215353 [ <i>Capitella teleta</i> ]                                                                 |
| Sipunculus_f10p60_2747_transcript7660_g1  | hypothetical protein CAPTEDRAFT_181489 [ <i>Capitella teleta</i> ]                                                                 |
| Sipunculus_f13p60_3004_transcript5726_g1  | PREDICTED: matrix metalloproteinase-16-like [ <i>Lingula anatina</i> ]                                                             |
| Sipunculus_f27p60_1856_transcript16022_g1 | PREDICTED: uncharacterized protein LOC105667360 [ <i>Linepithema humile</i> ]                                                      |
| Sipunculus_f7p60_3280_transcript4274_g1   | PREDICTED: trifunctional enzyme subunit alpha, mitochondrial-like [ <i>Biomphalaria glabrata</i> ]                                 |
| Sipunculus_f3p57_2394_transcript10474_g1  | PREDICTED: uncharacterized protein LOC106868732 isoform X1 [ <i>Octopus bimaculoides</i> ]                                         |
| Sipunculus_f4p60_1717_transcript17323_g2  | PREDICTED: leukocyte antigen CD37 isoform X1 [ <i>Camelus ferus</i> ]                                                              |
| Sipunculus_f3p60_2203_transcript12309_g1  | PREDICTED: T-complex protein 1 subunit eta-like isoform X1 [ <i>Lingula anatina</i> ]                                              |
| Sipunculus_f11p60_3036_transcript5533_g1  | PREDICTED: glutamine--tRNA ligase-like [ <i>Lingula anatina</i> ]                                                                  |
| Sipunculus_f5p60_3695_transcript2696_g1   | PREDICTED: mitochondrial 2-oxoglutarate/malate carrier protein-like [ <i>Limulus polyphemus</i> ]                                  |
| Sipunculus_f2p39_2761_transcript7227_g1   | hypothetical protein LOTGIDRAFT_128909, partial [ <i>Lottia gigantea</i> ]                                                         |
| Sipunculus_f8p60_2689_transcript7798_g1   | PREDICTED: stress-induced-phosphoprotein 1-like [ <i>Lingula anatina</i> ]                                                         |
| Sipunculus_f3p60_1145_transcript19952_g4  | PREDICTED: small nuclear ribonucleoprotein F [ <i>Lingula anatina</i> ]                                                            |
| Sipunculus_f11p60_2784_transcript6547_g1  | chaperonin subunit, putative [ <i>Ixodes scapularis</i> ]                                                                          |
| Sipunculus_f2p50_2563_transcript8840_g1   | PREDICTED: myelin expression factor 2-like isoform X2 [ <i>Octopus bimaculoides</i> ]                                              |
| Sipunculus_f2p32_4655_transcript1020_g1   | hypothetical protein CAPTEDRAFT_170444 [ <i>Capitella teleta</i> ]                                                                 |
| Sipunculus_f3p43_3129_transcript5014_g1   | PREDICTED: coiled-coil domain-containing protein 173-like [ <i>Lingula anatina</i> ]                                               |
| Sipunculus_f2p22_4187_transcript1643_g1   | PREDICTED: MAM and LDL-receptor class A domain-containing protein 1-like [ <i>Lingula anatina</i> ]                                |
| Sipunculus_f8p60_2886_transcript6545_g1   | hypothetical protein LOTGIDRAFT_200177 [ <i>Lottia gigantea</i> ]                                                                  |
| Sipunculus_f6p60_1939_transcript15139_g2  | elongation factor 1-alpha [ <i>Danio rerio</i> ]                                                                                   |

---



|           |                                           |                                                                                               |
|-----------|-------------------------------------------|-----------------------------------------------------------------------------------------------|
|           | Sipunculus_f18p60_3559_transcript3151_g1  | PREDICTED: proliferation-associated protein 2G4-like isoform X1<br>[Saccoglossus kowalevskii] |
|           | Sipunculus_f2p7_1874_transcript16074_g1   | PREDICTED: RNA-binding protein lark-like [Crassostrea gigas]                                  |
|           | Sipunculus_f2p60_1331_transcript19407_g1  | PREDICTED: ubiquitin-fold modifier-conjugating enzyme 1 [Crassostrea gigas]                   |
|           | Sipunculus_f2p60_2550_transcript8974_g2   | PREDICTED: TOX high mobility group box family member 4-A-like<br>[Limulus polyphemus]         |
|           | Sipunculus_f2p42_2764_transcript7239_g1   | PREDICTED: hemicentin-1-like [Halyomorpha halys]                                              |
|           | Sipunculus_f2p52_2557_transcript8894_g1   | heat shock protein 70 [Cellana toreuma]                                                       |
|           | Sipunculus_f7p60_2700_transcript7816_g2   | GPI-linked carbonic anhydrase [Cherax quadricarinatus]                                        |
|           | Sipunculus_f4p60_2257_transcript11671_g1  | PREDICTED: stress-70 protein, mitochondrial [Gekko japonicus]                                 |
|           | Sipunculus_f2p21_3803_transcript2461_g1   | hypothetical protein CAPTEDRAFT_223748 [Capitella teleta]                                     |
| Cluster 2 | Sipunculus_f25p60_1530_transcript18479_g1 | cofilin [Sphaeroforma arctica JP610]                                                          |
|           | Sipunculus_f2p60_1702_transcript17384_g3  | Tubulin alpha-1 chain [Acromyrmex echinator]                                                  |
|           | Sipunculus_f7p60_2477_transcript9537_g1   | heat shock protein 70 [Rhagoletis pomonella]                                                  |
|           | Sipunculus_f2p26_2337_transcript11013_g1  | PREDICTED: protein Skeletor, isoforms B/C-like [Lingula anatina]                              |
|           | Sipunculus_f2p36_4465_transcript1232_g1   | hypothetical protein CAPTEDRAFT_228725 [Capitella teleta]                                     |
|           | Sipunculus_f4p60_538_transcript20798_g1   | hypothetical protein BRAFLDRAFT_152201 [Branchiostoma floridae]                               |
|           | Sipunculus_f3p60_2899_transcript6438_g2   | hypothetical protein HELRODRAFT_175309 [Helobdella robusta]                                   |
|           | Sipunculus_f2p13_2622_transcript8499_g1   | heat shock protein 70 [Rhagoletis pomonella]                                                  |
|           |                                           |                                                                                               |
|           | Sipunculus_f2p29_2771_transcript7191_g1   | PREDICTED: LOW QUALITY PROTEIN: protein toll-like [Lingula anatina]                           |
|           | Sipunculus_f3p48_4847_transcript848_g1    | hypothetical protein HELRODRAFT_110263 [Helobdella robusta]                                   |
|           | Sipunculus_f2p19_3265_transcript4365_g1   | PREDICTED: mid1-interacting protein 1-B-like [Lingula anatina]                                |
|           | Sipunculus_f3p60_2097_transcript13597_g4  | PREDICTED: aldehyde dehydrogenase family 8 member A1 [Pelodiscus sinensis]                    |
|           | Sipunculus_f3p60_2548_transcript8940_g1   | PREDICTED: midnolin-B-like isoform X1 [Halyomorpha halys]                                     |
|           | Sipunculus_f3p20_2734_transcript7600_g1   | PREDICTED: zonadhesin-like, partial [Phaethon lepturus]                                       |
|           | Sipunculus_f4p60_2568_transcript8875_g1   | hypothetical protein BRAFLDRAFT_276665 [Branchiostoma floridae]                               |
| Cluster 7 | Sipunculus_f2p15_3742_transcript2617_g1   | PREDICTED: signal peptide, CUB and EGF-like domain-containing<br>protein 3 [Lingula anatina]  |
|           | Sipunculus_f2p30_1777_transcript16625_g1  | RecName: Full=Hemerythrin                                                                     |
|           | Sipunculus_f2p54_2646_transcript8139_g1   | PREDICTED: uncharacterized protein LOC106176979 isoform X3 [Lingula anatina]                  |
|           | Sipunculus_f2p37_2999_transcript5830_g1   | PREDICTED: unconventional myosin-VI-like [Lingula anatina]                                    |
|           | Sipunculus_f4p60_3148_transcript4891_g2   | PREDICTED: uncharacterized protein LOC100892120 [Strongylocentrotus purpuratus]               |
|           | Sipunculus_f9p60_4425_transcript1317_g1   | PREDICTED: inorganic pyrophosphatase-like [Saccoglossus kowalevskii]                          |
|           | Sipunculus_f5p60_1304_transcript19475_g1  | PREDICTED: ras-like GTP-binding protein Rho1 isoform X2 [Linepithema humile]                  |
|           |                                           |                                                                                               |
|           | Sipunculus_f2p60_2154_transcript12808_g3  | hypothetical protein CAPTEDRAFT_168933 [Capitella teleta]                                     |

---

|                                          |                                                                                                                      |
|------------------------------------------|----------------------------------------------------------------------------------------------------------------------|
| Sipunculus_f5p60_3345_transcript4011_g3  | PREDICTED: uncharacterized protein LOC106065023 [Biomphalaria glabrata]                                              |
| Sipunculus_f2p52_3240_transcript4435_g1  | hypothetical protein CAPTEDRAFT_223627 [Capitella teleta]                                                            |
| Sipunculus_f3p24_4593_transcript1090_g1  | PREDICTED: SCO-spondin-like isoform X4 [Lingula anatina]                                                             |
| Sipunculus_f2p38_3075_transcript5310_g1  | hypothetical protein CAPTEDRAFT_164667 [Capitella teleta]                                                            |
| Sipunculus_f2p28_2972_transcript6021_g1  | PREDICTED: protein Skeletor, isoforms B/C-like [Lingula anatina]                                                     |
| Sipunculus_f3p36_4238_transcript1577_g1  | hypothetical protein LOTGIDRAFT_231476 [Lottia gigantea]                                                             |
| Sipunculus_f2p60_1623_transcript17865_g1 | hypothetical protein EAG_16421, partial [Camponotus floridanus]                                                      |
| Sipunculus_f7p60_1827_transcript16193_g1 | PREDICTED: syncollin [Esox lucius]                                                                                   |
| Sipunculus_f2p36_2575_transcript8719_g1  | PREDICTED: low-density lipoprotein receptor-related protein 8-like [Halyomorpha halys]                               |
| Sipunculus_f3p60_2909_transcript6449_g3  | PREDICTED: cytochrome P450 3A8-like [Saccoglossus kowalevskii]                                                       |
| Sipunculus_f4p53_4894_transcript845_g1   | PREDICTED: sushi, von Willebrand factor type A, EGF and pentraxin domain-containing protein 1-like [Lingula anatina] |
| Sipunculus_f5p60_2227_transcript12044_g1 | PREDICTED: heterogeneous nuclear ribonucleoprotein R isoform X9 [Linepithema humile]                                 |
| Sipunculus_f2p28_3135_transcript5416_g1  | inhibitor of nuclear factor-kappaB protein [Pinctada fucata]                                                         |
| Sipunculus_f2p24_1685_transcript17407_g1 | hypothetical protein HELRODRAFT_187046 [Helobdella robusta]                                                          |
| Sipunculus_f13p60_2933_transcript6302_g1 | hypothetical protein CAPTEDRAFT_179168 [Capitella teleta]                                                            |
| Sipunculus_f3p60_1548_transcript18363_g1 | ADP ribosylation factor 79F [Argas monolakensis]                                                                     |
| Sipunculus_f2p21_1604_transcript17980_g1 | PREDICTED: vascular endothelial growth factor A-like [Limulus polyphemus]                                            |
| Sipunculus_f2p19_3158_transcript4822_g1  | PREDICTED: uncharacterized protein LOC100378011 [Saccoglossus kowalevskii]                                           |

---
